# Supplementary material for: Feedback regulation of TORC1 by its downstream effectors Npr1 and Par32
Source: PubMed Central journal article supplement — Mol Biol Cell. 2018 Nov 1;29(22):2751–65. doi: 10.1091/mbc.E18-03-0158 (PMC6249832; doi:10.1091/mbc.e18-03-0158), 2018-11-01
Supplement: mbc-29-2751-s001.pdf [file mbc-29-2751-s001.pdf]

# Supplemental Materials

*Molecular Biology of the Cell*

Varlakhanova et al.

**Table S1: Plasmids used in this work:**

| Plasmid                           | Details                                            | Source    |
|-----------------------------------|----------------------------------------------------|-----------|
| <i>S cer.PAR32</i>                | pRS316 <i>S cer.PAR32</i>                          | This work |
| <i>S cer.PAR32</i> 4x mut         | pRS315 <i>S cer.PAR32</i> 4x<br>GRGGAG-AAAAAA      | This work |
| <i>S cer. PAR32</i> N295A         | pRS316 <i>S cer. PAR32</i> N295A                   | This work |
| <i>S cer. PAR32</i> K291A         | pRS316 <i>S cer. PAR32</i> K291A                   | This work |
| <i>S cer. PAR32</i> Δ288-295      | pRS316 <i>S cer. PAR32</i> Δ288-<br>295            | This work |
| <i>S cer. PAR32</i> Δ276-295      | pRS316 <i>S cer. PAR32</i> Δ276-<br>295            | This work |
| <i>S cer.PAR32</i> -EGFP          | pRS316 <i>S cer.PAR32</i> -EGFP                    | This work |
| <i>S cer.PAR32</i> 4x mut-EGFP    | pRS315 <i>S cer.PAR32</i> 4x<br>GRGGAG-AAAAAA-EGFP | This work |
| <i>S cer. PAR32</i> N295A-EGFP    | pRS316 <i>S cer. PAR32</i> N295A-<br>EGFP          | This work |
| <i>S cer. PAR32</i> K291A-EGFP    | pRS316 <i>S cer. PAR32</i> K291A-<br>EGFP          | This work |
| <i>S cer. PAR32</i> Δ276-295-EGFP | pRS316 <i>S cer. PAR32</i> Δ276-<br>295-EGFP       | This work |
| <i>S cer. PAR32</i> Δ288-295-EGFP | pRS316 <i>S cer. PAR32</i> Δ288-<br>295-EGFP       | This work |

|                                 |                                                                       |                             |
|---------------------------------|-----------------------------------------------------------------------|-----------------------------|
|                                 | 295-EGFP                                                              |                             |
| <i>S cer.PAR32-3xHA</i>         | pRS316 <i>S cer. PAR32-3xHA</i>                                       | (Varlakhanova et al., 2017) |
| <i>S cer.PAR32 4xmut-3xHA</i>   | pRS316 <i>S cer. PAR32 4xmut-3xHA</i>                                 | This work                   |
| <i>S cer.PAR32 N295A-3xHA</i>   | pRS316 <i>S cer. PAR32 N295A-3xHA</i>                                 | This work                   |
| <i>S cer.PAR32 K291A-3xHA</i>   | pRS316 <i>S cer. PAR32 K291A-3xHA</i>                                 | This work                   |
| <i>S cer.PAR32Δ276-295-3xHA</i> | pRS316 <i>S cer. PAR32Δ276-295-3xHA</i>                               | This work                   |
| <i>S cer.PAR32Δ288-295-3xHA</i> | pRS316 <i>S cer. PAR32Δ288-295-3xHA</i>                               | This work                   |
| NLS- <i>PAR32</i>               | pRS316 NLS- <i>S cer. PAR32</i>                                       | This work                   |
| NLS- <i>PAR32</i> 4x mut        | pRS316 NLS- <i>S cer. PAR32</i> 4x GRGGAG-AAAAAA                      | This work                   |
| NLS- <i>PAR32</i> -EGFP         | pRS316 NLS- <i>S cer. PAR32</i> -EGFP                                 | This work                   |
| NLS- <i>PAR32</i> 4x mut-EGFP   | pRS316 NLS- <i>S cer. PAR32</i> 4x GRGGAG-AAAAAA-EGFP                 | This work                   |
| <i>GAP1-lacZ</i>                | pRS314 <i>GAP1</i> prom- <i>GAP1</i> 1-53- <i>E. coli lacZ</i> 10-end | This work                   |

|                    |                                               |                             |
|--------------------|-----------------------------------------------|-----------------------------|
| <i>TOR1</i> L2134M | pRS426 <i>S cer. TOR1</i> L2134M              | (Varlakhanova et al., 2017) |
| EGFP- <i>TOR1</i>  | pRS316 EGFP- <i>S cer. TOR1</i>               | (Varlakhanova et al., 2017) |
| NLS-BFP            | pRS314 <i>TEF1</i> prom-NLS-<br>TagBFP        | This work                   |
| <i>GAP1</i> -GFP   | pRS416 <i>GAP1</i> prom- <i>GAP1</i> -<br>GFP | Allyson O'Donnell           |

**Table S2: Strains used in this work**

|        |                                                                                                                                                                                                                   |                             |
|--------|-------------------------------------------------------------------------------------------------------------------------------------------------------------------------------------------------------------------|-----------------------------|
| W303A  | <i>MATa</i> ; <i>ade2-1</i> ; <i>leu2-3,112</i> ; <i>his3-11,15</i> ; <i>trp1-1</i> ;<br><i>ura3-1</i> ; <i>can1-100</i>                                                                                          |                             |
| PY_126 | <i>MATa</i> ; <i>ade2-1</i> ; <i>leu2-3,112</i> ; <i>his3-11,15</i> ; <i>trp1-1</i> ;<br><i>ura3-1</i> ; <i>can1-100</i> ; $\Delta$ <i>pib2::KAN</i>                                                              | (Varlakhanova et al., 2017) |
| PY_150 | <i>MATa</i> ; <i>ade2-1</i> ; <i>leu2-3,112</i> ; <i>his3-11,15</i> ; <i>trp1-1</i> ;<br><i>ura3-1</i> ; <i>can1-100</i> ; $\Delta$ <i>npr1::NAT</i>                                                              | (Varlakhanova et al., 2017) |
| PY_154 | <i>MATa</i> ; <i>ade2-1</i> ; <i>leu2-3,112</i> ; <i>his3-11,15</i> ; <i>trp1-1</i> ;<br><i>ura3-1</i> ; <i>can1-100</i> ; $\Delta$ <i>par32::NAT</i>                                                             | This work                   |
| PY_164 | <i>MATa</i> ; <i>ade2-1</i> ; <i>leu2-3,112</i> ; <i>his3-11,15</i> ; <i>trp1-1</i> ;<br><i>ura3-1</i> ; <i>can1-100</i> ; $\Delta$ <i>npr1::KAN</i> $\Delta$ <i>par32::NAT</i>                                   | This work                   |
| PY_178 | <i>MATa</i> ; <i>ade2-1</i> ; <i>leu2-3,112</i> ; <i>his3-11,15</i> ; <i>trp1-1</i> ;<br><i>ura3-1</i> ; <i>can1-100</i> ; $\Delta$ <i>mep1::KAN</i> ; $\Delta$ <i>mep3::HIS3</i>                                 | This work                   |
| PY_180 | <i>MATa</i> ; <i>ade2-1</i> ; <i>leu2-3,112</i> ; <i>his3-11,15</i> ; <i>trp1-1</i> ;<br><i>ura3-1</i> ; <i>can1-100</i> ; $\Delta$ <i>mep1::KAN</i> ;<br>$\Delta$ <i>mep3::HIS3</i> ; $\Delta$ <i>npr1::NAT</i>  | This work                   |
| PY_184 | <i>MATa</i> ; <i>ade2-1</i> ; <i>leu2-3,112</i> ; <i>his3-11,15</i> ; <i>trp1-1</i> ;<br><i>ura3-1</i> ; <i>can1-100</i> ; $\Delta$ <i>mep1::KAN</i> ;<br>$\Delta$ <i>mep3::HIS3</i> ; $\Delta$ <i>par32::NAT</i> | This work                   |
| PY_194 | <i>MATa</i> ; <i>ade2-1</i> ; <i>leu2-3,112</i> ; <i>his3-11,15</i> ; <i>trp1-1</i> ;<br><i>ura3-1</i> ; <i>can1-100</i> ; $\Delta$ <i>gat1::HIS3</i>                                                             | This work                   |
| PY_198 | <i>MATa</i> ; <i>ade2-1</i> ; <i>leu2-3,112</i> ; <i>his3-11,15</i> ; <i>trp1-1</i> ;                                                                                                                             | This work                   |

|        |                                                                                                           |           |
|--------|-----------------------------------------------------------------------------------------------------------|-----------|
|        | <i>ura3-1; can1-100; Δpar32::NAT; Δgat1::HIS3</i>                                                         |           |
| PY_208 | <i>MATa; ade2-1; leu2-3,112; his3-11,15; trp1-1;</i><br><i>ura3-1; can1-100; Δgln3::HIS3</i>              | This work |
| PY_210 | <i>MATa; ade2-1; leu2-3,112; his3-11,15; trp1-1;</i><br><i>ura3-1; can1-100; Δpar32::NAT; Δgln3::HIS3</i> | This work |

**Figure S1.** (A) Expression of a constitutively active Tor1 mutant allele partially rescues the  $\Delta par32$  rapamycin sensitivity. Exponentially-growing W303A or  $\Delta par32$  cells ( $OD_{600}$  0.6-0.8) expressing the *TOR1* L2134M as indicated were treated with rapamycin (200 ng/ml in YPD) for 5 hr at 30 °C. Cells were then washed and plated on YPD. Cells were imaged after incubation for 2 days at 30 °C. (B) Quantifications of differences in plasma membrane to cytosol (left charts) and nucleus to cytosol (right charts) ratios of Par32-EGFP expressed in W303A (upper charts) or  $\Delta npr1$  (lower charts) cells. Growth conditions and treatment times as indicated. Differences in means of membrane to cytosol ratios in W303A and  $\Delta npr1$  cells were significantly heterogeneous (one-way ANOVA: W303A –  $F_{4,31} = 4.29$  hence  $p = 0.007$ ;  $\Delta npr1$  –  $F_{4,31} = 10.33$  hence  $p = 1.95E-5$ ). Similarly, differences in means of nucleus to cytosol ratios in W303A and  $\Delta npr1$  cells were significantly heterogeneous (one-way ANOVA: W303A –  $F_{4,35} = 34.19$  hence  $p = 1.21E-11$ ;  $\Delta npr1$  –  $F_{4,36} = 13.07$  hence  $p = 1.14E-6$ ). Significantly different pairs of means, as assessed by the post-hoc Tukey HSD test, are indicated (\*,  $p < 0.05$ ; \*\*,  $p < 0.01$ ).

**Figure S2.** Par32 subcellular localization in cells grown in different carbon sources. W303A cells expressing Par32-EGFP were grown in glucose (YPD), ethanol / glycerol (YPEG) or galactose (YPGAL). The plasma membrane stained with 10  $\mu$ M FM 4-64 for 30 min on ice prior to visualization. Scale bar 5  $\mu$ m.

**Figure S3.** Nuclear localization of Par32 depends on the four conserved GRGGAGNI motifs. W303A and  $\Delta npr1$  cells expressing the indicated EGFP-tagged Par32 construct as well as NLS-BFP (NLS – SV40 Large T Antigen nuclear localization sequence) were grown under conditions of nitrogen starvation (SD –N) for 3 hr prior to imaging. The plasma membrane stained with 10  $\mu$ M FM 4-64 for 30 min on ice prior to visualization. Scale bar 5  $\mu$ m.

**Figure S4.** (A) Nuclear localization of NLS-Par32 and NLS-Par32 4x mut in W303A and  $\Delta par32$  cells. W303A or  $\Delta par32$  cells expressing the indicated EGFP-tagged NLS-Par32 fusion (SV40 Large T Antigen nuclear localization sequence) were grown in SC. (B) Rapamycin treatment does not prevent nuclear accumulation of EGFP-tagged NLS-Par32. W303A or  $\Delta par32$  cells expressing NLS-Par32-EGFP were treated with rapamycin (200 ng/ml, 3 hr) prior to imaging. (C) Plasma membrane association of Par32 is Mep1- and Mep3-independent.  $\Delta mep1 \Delta mep3 \Delta npr1$  cells expressing Par32-EGFP were grown in SC or SD-N for 3 hr prior to imaging. The plasma membrane was labeled with 10  $\mu$ M FM 4-64 for 30 min on ice prior to visualization. Scale bars 5  $\mu$ m.

**Figure S5.** Deletion of Gat1 (A) or Gln3 (B) does not rescue the defect in recovery from rapamycin exposure of  $\Delta par32$  cells. Exponentially-growing ( $OD_{600}$  0.6-0.8) cells, as indicated, were untreated or treated with rapamycin (200 ng/ml in YPD) for 5 hr at 30 °C. Cells were then washed and plated on YPD. Cells were imaged after incubation for 2 days at 30 °C. The left-



most spot in each case corresponds to 2  $\mu$ l of a culture with OD<sub>600</sub> 0.5. Spots to the right of this correspond to 2  $\mu$ l of sequential 5-fold dilutions.

A

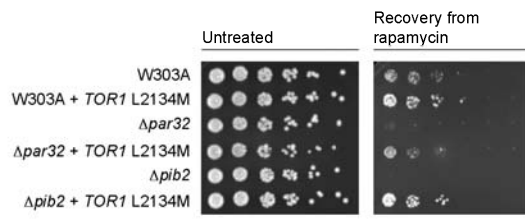

B

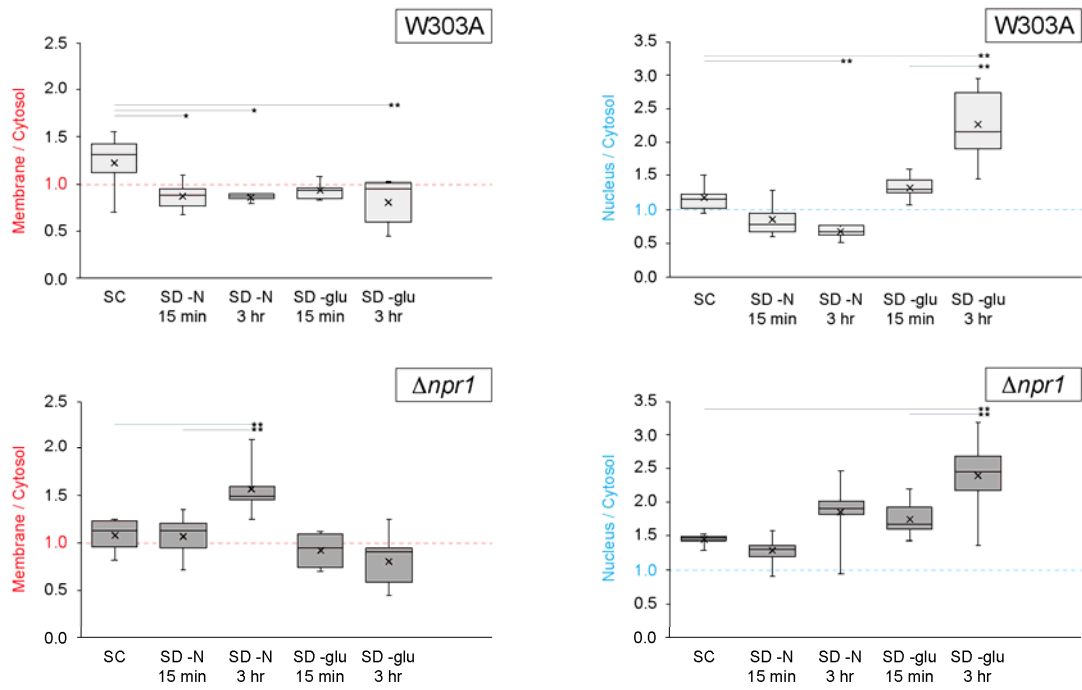

Fig. S1

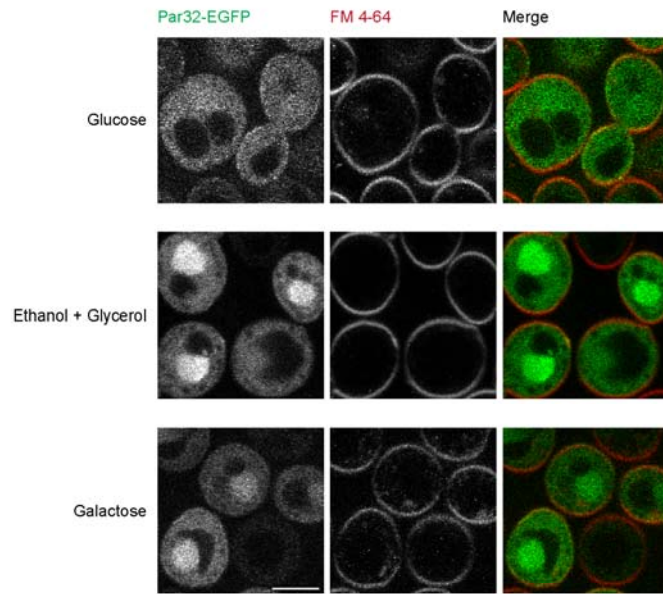

**Fig. S2**

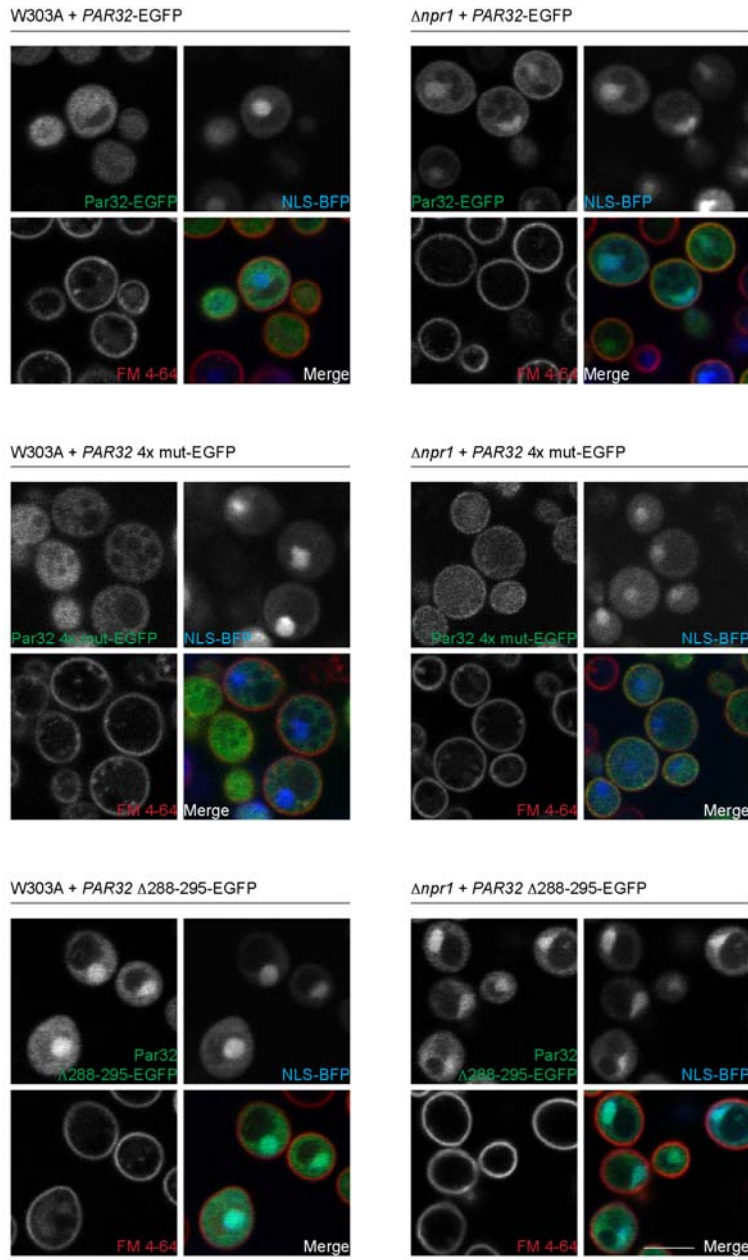

Fig. S3

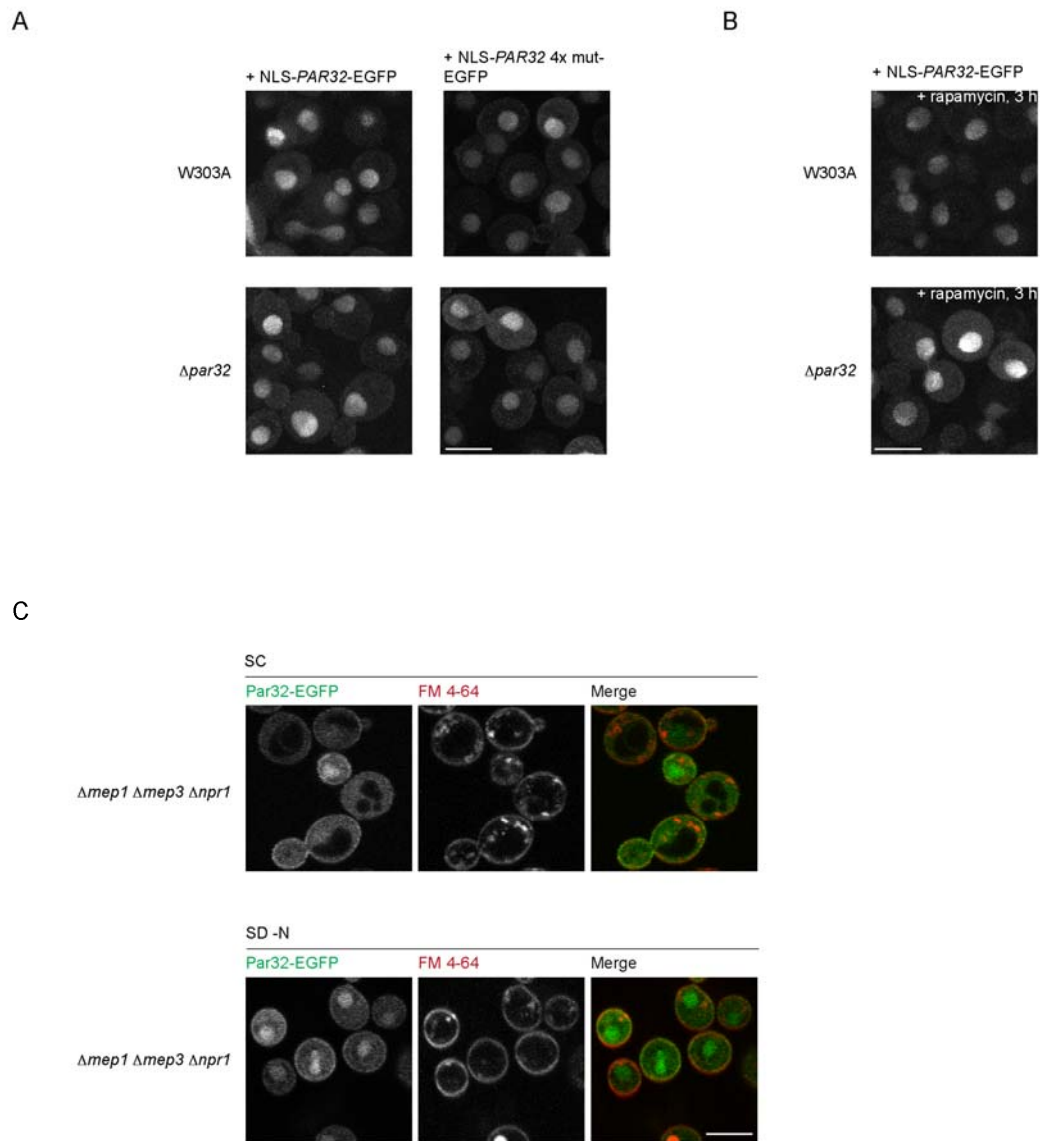

**Fig. S4**

A

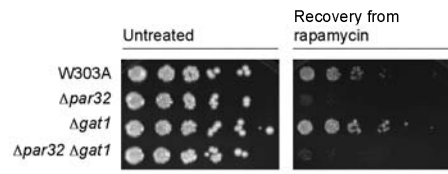

B

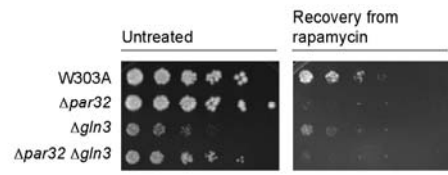

Fig. S5
